# Supplementary material for: Phylogenomics of Ligand-Gated Ion Channels Predicts Monepantel Effect
Source: PLoS Pathog. 2010 Sep 9;6(9):e1001091. doi: 10.1371/journal.ppat.1001091 (PMC2936538; doi:10.1371/journal.ppat.1001091)
Supplement: Figure S2 — Haemonchus contortus Hco-acr-17 cDNA sequence. Nucleotide sequence from Haemonchus contortus Hco-acr-17 cDNA with conceptual peptide translation. Putative transmembrane domains TMD1-TMD4 are highlighted in grey. Prominent conserved LGIC α subunit loops are highlighted in green. Export signals, as predicted by Phobius, are highlighted blue. (0.46 MB PDF) [file ppat.1001091.s002.pdf]

## Supplementary Figure 2

### *Hco-acr-17H*

```
-----|-----|-----|-----|-----|-----|-----|-----|-----|
1 ATGATCAGGATGTTAGCAATTCTTACATTATACCTATGGTCCGAGCCGAAGCCAACAGCAACAGCTAATGGCCGAGTTATTCGGTAACTACAGGAAAG 100
1 M I R M L A I L T L Y P M V R A E G Q Q Q Q L M A E L F G N Y R K E 34
Export signal
-----|-----|-----|-----|-----|-----|-----|-----|-----|
101 AATTGAGACCAGTGAAATCGTTTGATTTCGGGTCCACAAATGTCACTGTTCAATTATACCTTCAAGCAAATCCAAAAAGTACAAGAAAATGATCAGATAAT 200
35 L R P V K S F D S G P T N V T V Q L Y F K Q I Q K V Q E N D Q I I 67
-----|-----|-----|-----|-----|-----|-----|-----|-----|
201 TACCATCTACTGCTGGCTCGAAGAGTACTGGTATGACGAATTCCTTACGTGGAAACCTGAAGAATTTGGCGGCGTCAAGGAACCTTCACGTGCCTTCACAA 300
68 T I Y C W L E E Y W Y D E F L T W K P E E F G G V K E L H V P S Q 100
-----|-----|-----|-----|-----|-----|-----|-----|-----|
301 ATGATTTGGCGACCAGATTTGCTAGTGACAAATATGCCAATGAACATACGAGAAAAACGAGATGCAAAACGAATGTCCAGATCGAACACACTGGCCGCA 400
101 M I W R P D L L V Y N N A N M N I R E N E M Q T N V Q I E H T G R I 134
-----|-----|-----|-----|-----|-----|-----|-----|-----|
401 TTTTCGCTATTCGGTGCCTGATCACCAGATACACTTGCATCTACGGCTTGAGCGATTTCCTTACGATCAGCAAATTTGTTACATTTTACTGGCGTCGTG 500
135 S L F R A L I T D I T G D L R L E R F P Y D Q Q I C Y I L L A S W 167
Cys-loop
-----|-----|-----|-----|-----|-----|-----|-----|-----|
501 GTCGTATGACGGCTCACAAATCATGCTTTATACAGCGGAGGAGCCTACAGCTGAACCAAGCAGAACAGGCATTCTGCGCAACAAATCCTCTCAGGACC 600
168 S Y D G S Q I M L Y T A E E P T A E P S T N R H S A Q Q N P L R T 200
-----|-----|-----|-----|-----|-----|-----|-----|-----|
601 AATCTCGCCGCACTAAATCACTATATTCTTAATATGGAATGGACACTGGTGGATTTCAGTACAGGAGCAATCTCAAATATTACGATTGCTGTCCAAATC 700
201 N L A A L N H Y I P N M E W T L V D F K Y R S N L K Y Y D C C P N P 234
-----|-----|-----|-----|-----|-----|-----|-----|-----|
701 CATATCCGGACATTTCTGACTTTTTTGCTATCAAACGGAACCCGTCATACTATCTATTTACTCTGATCATTCCTGCTGCGTTTCATCACAATCGTTACGGT 800
235 Y P D I S Y F F A I K R N P S Y Y L F T L I I P S A F I T I V T V 267
TMD1
-----|-----|-----|-----|-----|-----|-----|-----|-----|
801 GATCGGTTTCTTCACGCCACATTATCAACTGGTGAAAAACCCGAGAGGTCAGTCTGGGAGTCACTGCTCTGCTGTCTTTGGCTATAAATACTGATGATG 900
268 I G F F T P H S S T G E N T E K V S L G V T A L L S L A I I L M M 300
TMD2
-----|-----|-----|-----|-----|-----|-----|-----|-----|
901 GTTCCGACAAACTACCAGCCACGTCCAATCCGTACCGTTGCTAGGGCAATACATATATTGGTCTGATATTCATCATGTTCTCCTCGCCACTTATTGCACGA 1000
301 V S D K L P A T S N S V P L L G Q Y Y I G L I F I M F L A T Y C T T 334
TMD3
-----|-----|-----|-----|-----|-----|-----|-----|-----|
1001 CGTTCACGCTTGGGCTTCAGATGTCAGGGAATACGGGCCAACCTATTCCCGTCGAGTACGTGGGTTCCCTACTCTCAATACGAGTTAACAAATCTTCGTT 1100
335 F T L G L Q M Q G N T G Q P I S R R V R G F L L S I R V N K S S L 367
-----|-----|-----|-----|-----|-----|-----|-----|-----|
1101 ACTTCAATGGTTTTTCGGTAAAGAACTGATGAACACCCAGGAAACCATCAAGATGCGGTAAAAAATACGACAAGTTGTCCGAATTGAAGAAAACATTT 1200
368 L Q W F F G K E L M N T Q E T I K M R L K K Y D K L S E L K K T F 400
-----|-----|-----|-----|-----|-----|-----|-----|-----|
1201 GCCAAGAACTTCGTGACTTTCCAAACAAAGTTCCTCAAGACAGAAGAACCGAAGCATCAAAGTTACCCATGATTGACAGCAATGAGGAAGAGGAGGCCA 1300
401 A K N F V T F Q T K F L K T E E P K H Q K L P M I D S N E E E E A M 434
-----|-----|-----|-----|-----|-----|-----|-----|-----|
1301 TGCATAAGTAAACGATCCTATGCTGCATAACATAGTCATCGACCTTTTGGAAGGTGTCCAAGCTATCAGGCAAGAAATGCTTATGCAGGAGCATGTGAA 1400
435 R K V N D P M L H N I V I D L L E G V Q A I R Q E M L M Q E H V K 467
-----|-----|-----|-----|-----|-----|-----|-----|-----|
1401 ACGAATTCGAAGAGAATGGCAAAATGTTGGCCAGAATGATGAAAAGATGATCATGTGGGTATTCAATTGTGTGTACGATTCTATTCGCCTTATTTATGCTC 1500
468 R I R R E W Q M L A R M M E K M I M W V F I V C T I L F A L F M L 500
TMD4
-----|-----|-----|-----|-----|-----|-----|-----|-----|
1501 TACGATGACAAGATCCGCCAGTGATCACTGATGAATACATGAAAGAGAAGGCAGACGCTTGA 1563
501 Y D R Q D P P V I T D E Y M K E K A D A * 520
```
