# Supplementary material for: Phylogenomics of Ligand-Gated Ion Channels Predicts Monepantel Effect
Source: PubMed Central journal article supplement (PMC2936538; doi:10.1371/journal.ppat.1001091), 2010-09-09
Supplement: ppat.1001091.s001.pdf [file ppat.1001091.s001.pdf]

Supplementary  
Figure 1

*Hco-acr-5H*

```
-----|-----|-----|-----|-----|-----|-----|-----|-----|-----|
1 A TGGTTA TCATAA TTCTGT TGACG CTGAC ATACAC GGAATG TTTAGA GAAAT TCGGA AAACAA ATTAGC TTGTC GACGTC CACCT ATAGCT ACAAGA GAT 1 00
1 V I I L L T L T Y T E C L E K F G K Q I S L S T S T Y S Y K R W 34
Export signal
-----|-----|-----|-----|-----|-----|-----|-----|-----|-----|
101 G GTATGA CGAGAA TCGGCA ACATA GCTCT GAGCTC AACAA GGACTT CAAGA AGAAT ATCACA TGCACT TCGGA AGAAGC TTGGA AAATGG TAATGC GAC 2 00
35 Y D E N R Q H S S E L N N G L Q E E Y H M H L R R S L E N G N A T 67
-----|-----|-----|-----|-----|-----|-----|-----|-----|-----|
201 G ACTTTA AATCGG ACATTT CTTGC TCAGC TGGCGG AGGAGC GTCGGA AGTTC TTTGA GAACCT GAATGC TGGTG CATTCA TGAAC GACCAA CGTCCA CTG 3 00
68 T L N R T F L A Q L A E E R R K F F E N L N A G A F M N D Q R R L 100
-----|-----|-----|-----|-----|-----|-----|-----|-----|-----|
301 G TGGACG ATTTGC TAGACG AGAGC TACTA CGAGAA ACACGT CCATCC TCGGG TAGAT CACCTG AAGCCA ACTCG GATCAA CGTCA GCATGA GTCTTT ATC 4 00
101 V D D L L D E S Y Y E K H V H P R V D H L K P T R I N V S M S L Y Q 134
-----|-----|-----|-----|-----|-----|-----|-----|-----|-----|
401 A AATCCT CGACGT GGACGA AACT CGCAA AGTATC GTGGTA AACGTG TGGAT GGTGC AGAATT GGTACG ATGAA TTTCTT GACTG GGATCC CAGAGA GTA 5 00
135 I L D V D E H S Q S I V V N V W V O N W Y D E F L D W D P R E Y 167
D-loop
-----|-----|-----|-----|-----|-----|-----|-----|-----|-----|
501 T GGGATG TTGAAC AAAACC ATAGT ACCCT ATGATC AGATT GGATTC CGGAT ACCTA CTTGTA CAACAG TGAAG CGTTGG AACGA AAGAAA ACGAAA TCG 6 00
168 G M L N K T I V P Y D Q I I P D T Y L Y N S E A L E R K K T K S 200
A-loop
-----|-----|-----|-----|-----|-----|-----|-----|-----|-----|
601 A TAATGA ATGCGA TAGTGG AGACG GGATT TTGGTC GAACAA CAGCCT TGGGG CCAGA GTTCAG CTTATG TTTCC GGCTAT TTATA AGTTGT CTGCG CCA 7 00
201 M N A I V E T G F W S N N S L G A R V Q M F P A I Y K L S A 234
E-loop
-----|-----|-----|-----|-----|-----|-----|-----|-----|-----|
701 T GAACGT GCAATG GTTCC GTACG ACTCG CAGAAC TGTACA TTCATC ATTTG GAGTT GGACCC ATGATA AGGCT ACGATC GATTA CTGGGC CGAGCA CCC 8 00
235 N V Q W F P Y D S O N C T F I I S S T H D K A T I D Y W A E H P 267
Cys-loop B-loop
-----|-----|-----|-----|-----|-----|-----|-----|-----|-----|
801 A ACTGTG AATTTG AAGAAT ATGGC CCGAA ACGATG AATGGG AAGTGC TCGGA TTTGA GTTCGA ACGTAT AGAGC AAATCT TCAA TGTTGT GCAAA CCG 9 00
268 T V N I K N M A R N D E W E V L G F E F E R T E O I F K C C A N P 300
F-loop C-loop
-----|-----|-----|-----|-----|-----|-----|-----|-----|-----|
901 T GGGTAC TGCTCT ACGCAC ATTTG GTGAT TCGAAG AAAGCC GCTTTA CTATG TTATC AACCTT GTAATC CCTAC GTCAAT CATCA CAATCG TGGCTA TCA 1 000
301 V V I L Y A H L V I R R K P L Y Y V I N L V I P T S I I T I V A I T 334
TMD1
-----|-----|-----|-----|-----|-----|-----|-----|-----|-----|
1001 C TGGTTT CTTCAC ACCCAC TTCAA CCTCC AGTGAA CGTGAT GAAAA CTGTA TCTCG GTATCA ACACAC TTCTC ACAATG TCAAT TATGAT GCTTAT GGT 1 100
335 G F F T P T S T S S E R D E K L Y L G I N T L L T M S I M M L M V 367
TMD2
-----|-----|-----|-----|-----|-----|-----|-----|-----|-----|
1101 A TGCAAC CAGATG CCGTCA ACTTC GTCGT ATGTAC CACTGA TGAGTT GGTAC TACCT TGGAA CATCAT CGTCA TTGTGC TCGGA ACCCTA CTGGCT ACG 1 200
368 C N Q M P S T S S Y V P L M S W Y Y L G I I I V I V L G T L L A T 400
TMD3
-----|-----|-----|-----|-----|-----|-----|-----|-----|-----|
1201 A TAGTTC TAGCGA TTCACG GTCAA AAGCG TCACAA TCGACC ATTTGCT ACGAT GGGCA CGTGGT CTCGTG CTTAA CCGCTT CGTTG AGACCT TCATAC TGA 1 300
401 I V L A I H G Q K R H N R P L S R W A R G L V L N R F V E T F I L R 434
-----|-----|-----|-----|-----|-----|-----|-----|-----|-----|
1301 G ACCACC GTGTGC ACTCGT CGACT TGTGG AGCGAA TACGTT ATCGTC GAAGA ACGTC GTCTGT CGATGT CGAAG CTTGAC CCACT TCTAGT GCAGCA ACT 1 400
435 P P C A L V D L W S E Y G I V E E R R L S M S K L D P L L V Q Q L 467
-----|-----|-----|-----|-----|-----|-----|-----|-----|-----|
1401 T GATCCT ATCTCT CTGATG CCTCC CCGAC CTCGAG CATTTC TCGGCT CCATT TCGTC GAACAT GTCGGA AACGT CGTCCT ACTCC TATACA ACAAGG CTT 1 500
468 D P I S L M P P R P R A F F G S I S S N M S E T S S Y S Y T T R L 500
-----|-----|-----|-----|-----|-----|-----|-----|-----|-----|
1501 G CGACTC TAACCC GACAGT ACACC ACTCA GGTACG AGTAAG AGAAAA AGAGA GGCAG TCCTTC CTCTC AAGCA GTCTCA TCATG CACGAA GTGTTA AGC 1 600
501 A T L T R Q Y T T Q V R V R E K E R Q S F L L K Q S H H A R S V K R 534
-----|-----|-----|-----|-----|-----|-----|-----|-----|-----|
1601 G AAAAA AATGAG CAGGAG GTGTG CTCTC GAATGG GAGTAC CTAGCA AATGT GATCG ATCGTG TACTGT TAACG GTGTTT TCTGT AGTGAC TATGTC CCT 1 700
535 Q K M S R R C A L E W E Y L A N V I D R V L L T V F F V V T M S L 567
TMD4
-----|-----|-----|-----|-----|-----|-----|-----|-----|-----|
1701 T TTCCTG CTCTCT GTTGCT TTTGA CTATC TCTTTA CCGTAC ACAATC ATGTC CAGTA G 1 758
568 F L L L V A F D Y L F T V H N H V Q * 585
```
