# Supplementary material for: Phylogenomics of Ligand-Gated Ion Channels Predicts Monepantel Effect
Source: PubMed Central journal article supplement (PMC2936538; doi:10.1371/journal.ppat.1001091), 2010-09-09
Supplement: ppat.1001091.s003.pdf [file ppat.1001091.s003.pdf]

Supplementary  
Figure 3

*Hco-acr-24H*

```
-----|-----|-----|-----|-----|-----|-----|-----|-----|-----|
1 ATGAATGAACGGGGTGAATTTCTTCCGCATATACGGTTGGCTAAAGATTAAATGGATAAACGAAGATATGACTCTCGAGTACGACCGGTTCATGAATCATT 100
1 M N E R G E F L P H I R L A K D L M D K R R Y D S R V R P V M N H S 34
-----|-----|-----|-----|-----|-----|-----|-----|-----|-----|
101 CACAACCAACTACCGTCTGTTTTTCGATGAGTCTCTATCAAAATTTGGCCATCAATGAAAACGTCAAAAGTGTGATCTGAATGATGGGTGATCCAAAA 200
35 Q P T T V V F S M S L Y Q I L A I N E K R Q S V D L N V W V I Q K 67
-----|-----|-----|-----|-----|-----|-----|-----|-----|-----|
201 GTGGAAAGACGATTTCTTGGTTGGAATCCATACCTATACGGTATGATAAACACCACGATACTACCGTATGAAGCAATCTGGTTACCGGATACGTACGTA 300
68 W K D D F L G W N P Y L Y G M I N T T I L P Y E A I W L P D T Y V 100
-----|-----|-----|-----|-----|-----|-----|-----|-----|-----|
301 TACAATAGTGTGGTGATGAATCGTGAAGAGACGAACGGTATATAAATGTGGTTATCAGCACGAACACTGGAAGGCGAAAGAGGAGCTGAAATAAAGT 400
101 F N S V V M N R E E T E R F I N V V I S T N Y W K G E R G A E I K I 134
-----|-----|-----|-----|-----|-----|-----|-----|-----|-----|
401 TTATGTATCCAGCCTTATATCGTACCAGTTGCATGCTCGATATCAGGTTTTTCCCGTATGATCAACAAGAATGTAAGCTGATAATCTCATCATGGACCTC 500
135 M Y P A L Y R T S C M L D I R F F P Y D Q Q E C K L I I S S W T S 167
-----|-----|-----|-----|-----|-----|-----|-----|-----|-----|
501 ATCAAAAAGCGATATCGACTATACTGCGGAGTTCCATGGTGTCAACATGGACAATTTTCATCCAAATGAAGAAATGGATTGTAGTCAGCTTCAACATCAAA 600
168 S K S D I D Y T A E F H S V N M D N F I P N E E W I V V S F N I K 200
-----|-----|-----|-----|-----|-----|-----|-----|-----|-----|
601 CGGATCGAGGAGAAATTTGCTGCTGCCAGAACCATGGGTACTTTTGGAGCAGTACTGGTAGTTTCGACGTAAACCCCTATACTATATAGTAAATCTGG 700
201 K I E E K F V C C E P P W V L E A V L V V R R K P L Y Y I V N L V 234
-----|-----|-----|-----|-----|-----|-----|-----|-----|-----|
701 TCATCCGACATCAGTCATTACATGTCGCCGTAACCGTTTTCTTCCCGCAGCCTCGACCAGCACTGAAAGACGTGAAAGCTGTCCCTAGGCATCGA 800
235 I P T S V I T M V A V T G F F T A A S T S T E R R E K L S L G I D 267
-----|-----|-----|-----|-----|-----|-----|-----|-----|-----|
801 CTCGTTGCTAGCCATGTCTATCCTGATGATGATGGTATCGGAGCAGATGCCAACACAGTACTATGTACCTCTTTTGGCCATTCTATCTGACAATT 900
268 S L L A M S I L M M M V S E Q M P T T S D Y V P L F G L F Y L T I 300
-----|-----|-----|-----|-----|-----|-----|-----|-----|-----|
901 ATCATTGTGATCTTCATCGGAACACTATTTACGGCAATCATACTCAATATTACCTACAGAAGATGTACGCTCAACCAGTATCACCATTGATATCGTACT 1000
301 I I V I F I G T L F T A I I L N I H L Q K M Y A Q P V S P L I S Y L 334
-----|-----|-----|-----|-----|-----|-----|-----|-----|-----|
1001 TGTCTTCAATAAGGTAGCCTCGTTGCTTCGATTACATCCACCACAATGCTGTTGGAGCTCTGGGAAGAGACCGGTGTGCATTTGGACGATCCAATCG 1100
335 F F N K V A S L L R L H P P T M L L E L W E E T G V H F G R S N R 367
-----|-----|-----|-----|-----|-----|-----|-----|-----|-----|
1101 GAAGAATACACCAAGAAAAACGAAGCTTCAACCTCTTAATCTCATACCGAGCTTCTATTGAAAACGCTCCACCGCCACTGCTGAAGACTCCTCCA 1200
368 K N T P K K K P K L Q P L N S H T E L L L K T P P P P L L K T P P 400
-----|-----|-----|-----|-----|-----|-----|-----|-----|-----|
1201 CCGCTCCATCTAGAGATTTCCCTTCAACAGCCGAGTATACCTGATGAAAGCACCTTCTGCTACGCACTCAGACAGCTCGAAACAATGGAAGCGTTTAG 1300
401 P P P S R D S P F K Q P S I P D E S T L L R S Q T A R N N W K R L A 434
-----|-----|-----|-----|-----|-----|-----|-----|-----|-----|
1301 CTCGGAAGCTAGTGAACGAAGTAAAAAGGATGCAACAATGGCAATGGTACGCTTCCACCCTCGCCCCTACAGCCAATTCAACCAAGTGGCTGTC 1400
435 R K A S E R S K K D R N N G N G D V P P L R P L Q P I Q P S R L S 467
-----|-----|-----|-----|-----|-----|-----|-----|-----|-----|
1401 GGTTCAGCGGACGAGAACAAGATGACGAGGATTCACCACCATTAATGCAATGTCTCTCGGCACTCAGCACTACTGAAAACAGTTTACTCGAAAGTAAA 1500
468 V Q R E R E Q D D E D S P P L M Q C L S A L S T T E N S L L E S K 500
-----|-----|-----|-----|-----|-----|-----|-----|-----|-----|
1501 CTCAAAAGGAGGTACGCACTGGAATGGGAGTACCTGGCTACCGTCTTGGACAGACTACTGTGATCGTCTTCTCGATAGTGGTGTCTTCTCGTCACTTTCT 1600
501 L K R R Y A L E W E Y L A T V L D R L L L I V F S I V V F L V T F L 534
-----|-----|-----|-----|-----|-----|-----|-----|-----|-----|
1601 TGATGATCCTGATCGGCGAAGCGATGCACCTCTCATATCAAAATGACATCAGATGCAGCTCATCCACTAACGCCCTTAG 1677
535 M I L I G E A M H L S Y Q M T S D A A H P L T P * 558
```
