# Supplementary material for: Phylogenomics of Ligand-Gated Ion Channels Predicts Monepantel Effect
Source: PubMed Central journal article supplement (PMC2936538; doi:10.1371/journal.ppat.1001091), 2010-09-09

Supplementary Figure 6

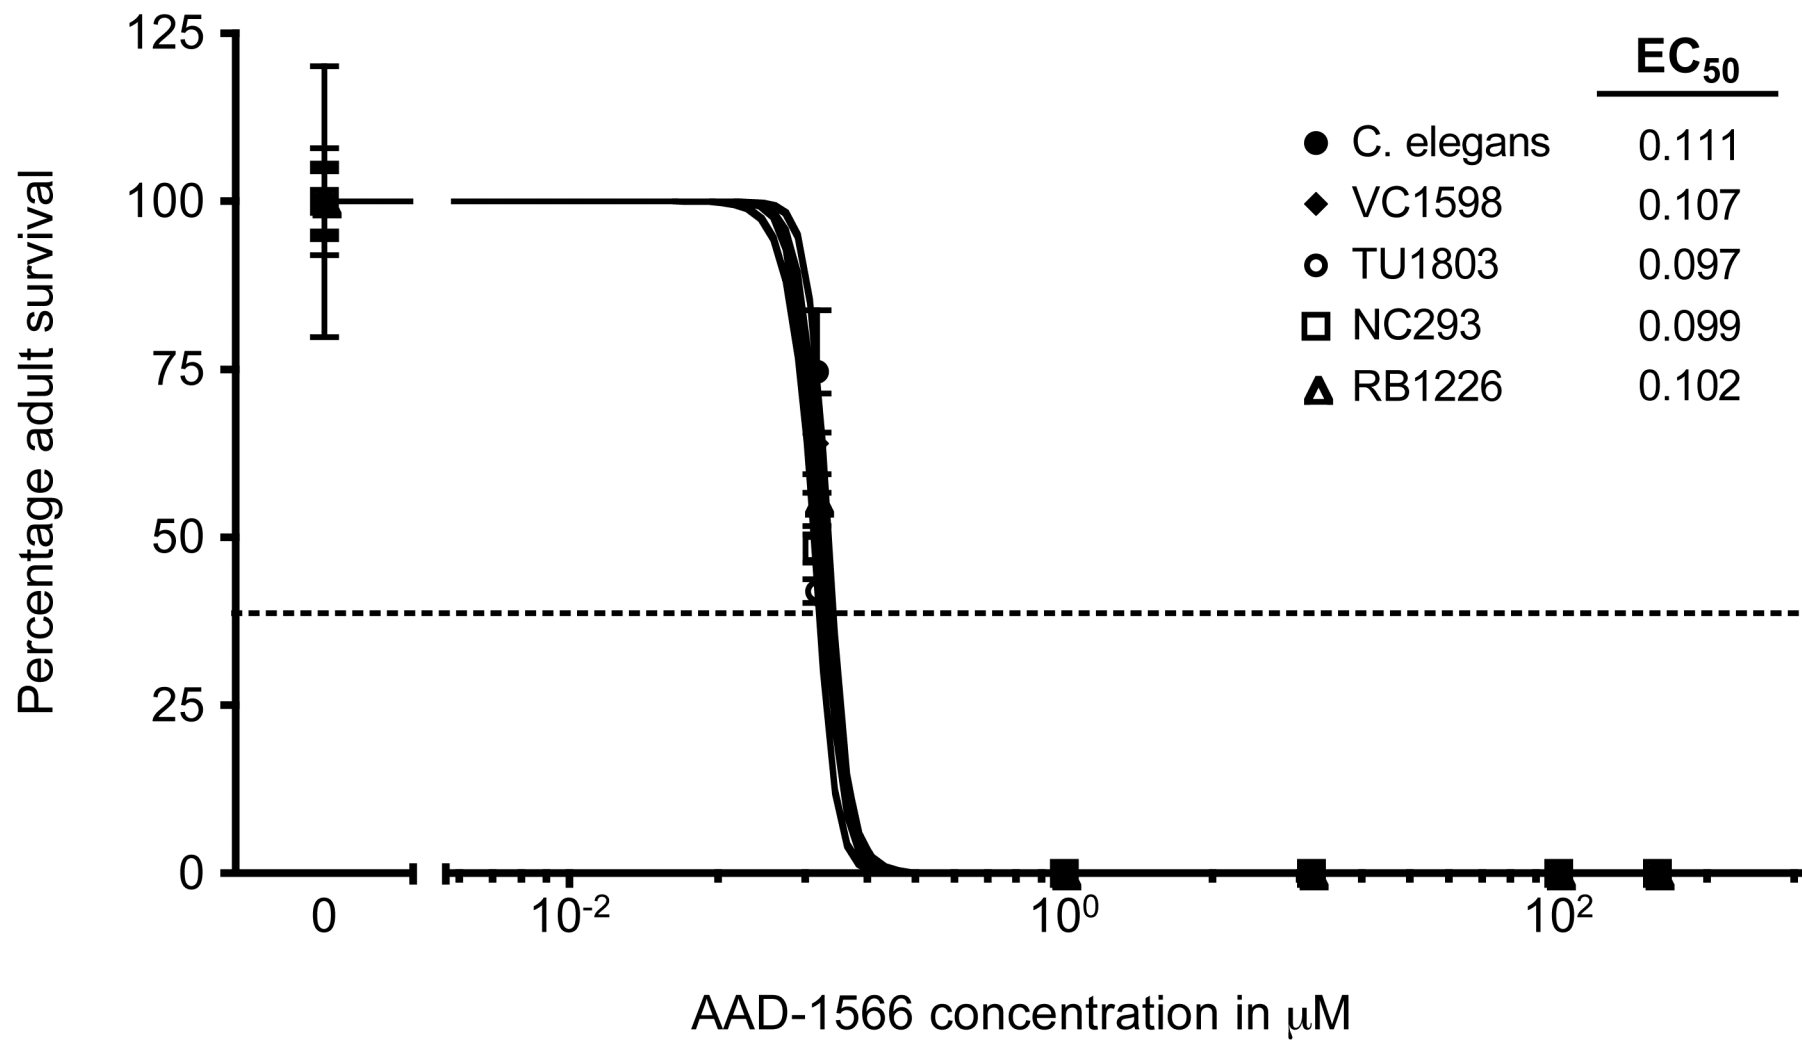

Supplement: ppat.1001091.s006.pdf [file ppat.1001091.s006.pdf]
