# Supplementary material for: Phylogenomics of Ligand-Gated Ion Channels Predicts Monepantel Effect
Source: PubMed Central journal article supplement (PMC2936538; doi:10.1371/journal.ppat.1001091), 2010-09-09

|                       | <u>EC<sub>50</sub> [nM] ± SEM</u> |
|-----------------------|-----------------------------------|
| □ <i>C. japonica</i>  | 13 ± 1.6                          |
| × <i>C. elegans</i>   | 17 ± 0.0                          |
| ■ <i>C. brenneri</i>  | 15 ± 1.2                          |
| ◆ <i>C. briggsae</i>  | 28 ± 7.4                          |
| ▲ <i>C. remanei</i>   | 15 ± 1.5                          |
| ● <i>P. pacificus</i> | 17 ± 2.8                          |
| ■ <i>S. ratti</i>     | 13,600 ± 7,000                    |

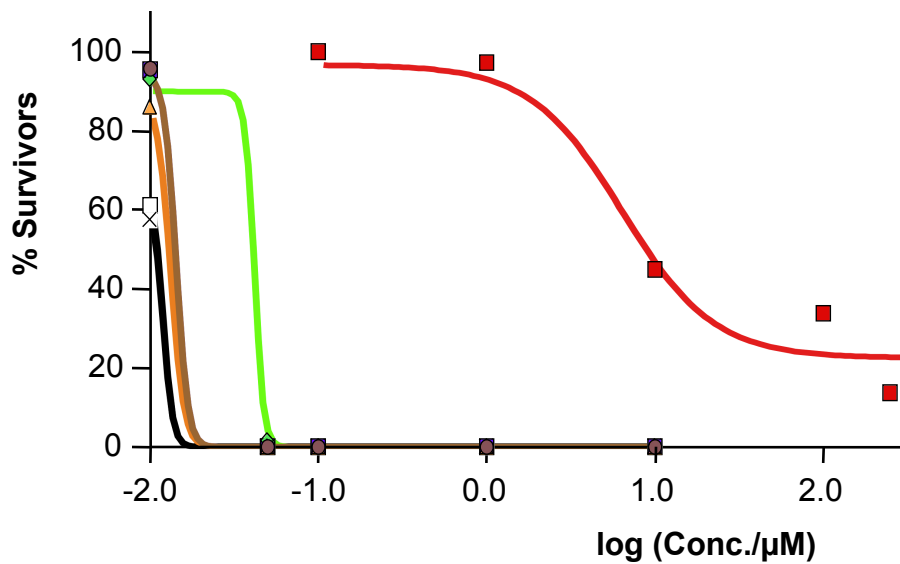

Supplement: ppat.1001091.s007.pdf [file ppat.1001091.s007.pdf]
