# Supplementary material for: Phylogenomics of Ligand-Gated Ion Channels Predicts Monepantel Effect
Source: PubMed Central journal article supplement (PMC2936538; doi:10.1371/journal.ppat.1001091), 2010-09-09
Supplement: ppat.1001091.s008.pdf [file ppat.1001091.s008.pdf]

Supplementary Table 1

| <b>Primer name</b>                    | <b>Sequence 5' → 3'</b>           |
|---------------------------------------|-----------------------------------|
| <u><i>For PCR on gDNA or cDNA</i></u> |                                   |
| SSU18A                                | AAAGATTAAGCCATGCATG               |
| SSU26R                                | CATTCTTGGCAAATGCTTCG              |
| SL1                                   | GGTTTAATTACCCAAGTTTGAG            |
| SL2                                   | GGTTTTAACCCAGTTACTCAAG            |
| NheI_ocr-5_frw2.1                     | GGCGGCTAGCCAATTGTCTTTACTTGGTCATGG |
| NotI_ocr-5_rev2.1                     | GGCGGCGGCCGCTATTCGGCATCCAAGGAAGA  |
| <i>Hco-ocr-5_frw10</i>                | GCAATGGTTTCCGTACGACT              |
| <i>Hco-ocr-5_frw11</i>                | CAAATCCGTGGGTACTGCTC              |
| <i>Hco-ocr-5_rev8</i>                 | AGGAGGCATGAGCGAGATAG              |
| <i>Hco-ocr-5_rev9</i>                 | CTTCGACATCGACAGACGAC              |
| NheI_ocr-17_frw1                      | GGCGGCTAGCGCTATGATCAGGATGTTAGCAA  |
| XhoI_ocr-17_rev1                      | GGCGCTCGAGGGTATCAAGCGTCTGCCTTC    |
| <i>Hco-ocr-17_frw1</i>                | TTGCTGTCCAAATCCATATCC             |
| <i>Hco-ocr-17_frw2</i>                | CGTTACGGTGATCGGTTTCT              |
| <i>Hco-ocr-17_rev4</i>                | CGATCACCGTAACGATTGTG              |
| <i>Hco-ocr-17_rev5</i>                | AGTATGACGGGTTCCGTTTG              |
| NheI_ocr-24_frw1                      | GGCGGCTAGCGATGAATGAACGGGGTGAAT    |
| XhoI_ocr-24_rev1                      | GGCGCTCGAGCTAAGGCGTTAGTGGATGAGC   |
| <i>Hco-ocr-24_frw1</i>                | GTTTGCTGCCAGAACCAT                |
| <i>Hco-ocr-24_frw2</i>                | CTGGTCGTTTCGTCGTAAACC             |
| <i>Hco-ocr-24_rev1</i>                | ACCTTTCAGTGCTGGTCGAT              |
| <i>Hco-ocr-24_rev2</i>                | GGTGAAGAAGCCAGTGACG               |
