# Supplementary material for: Phylogenomics of Ligand-Gated Ion Channels Predicts Monepantel Effect
Source: PubMed Central journal article supplement (PMC2936538; doi:10.1371/journal.ppat.1001091), 2010-09-09
Supplement: ppat.1001091.s009.pdf [file ppat.1001091.s009.pdf]

| DMSO concentration in %    | 0     | 0.1   | 1     | 2.5   |
|----------------------------|-------|-------|-------|-------|
| <b><i>C. elegans</i></b>   | 59    | 50    | 50    | 24    |
|                            | 65    | 65    | 68    | 29    |
|                            | 72    | 57    | 56    | 31    |
| <i>Average</i>             | 65.3  | 57.3  | 58.0  | 28.0  |
| <i>% control</i>           | 100.0 | 87.8  | 88.8  | 42.9  |
| <i>Standard deviation</i>  | 6.5   | 7.5   | 9.2   | 3.6   |
| <i>t-test</i>              |       | 0.237 | 0.328 | 0.003 |
| <b><i>C. japonica</i></b>  | 29    | 30    | 24    | 0     |
|                            | 39    | 30    | 27    | 5     |
|                            | 20    | 25    | 15    | 4     |
| <i>Average</i>             | 29.3  | 28.3  | 22.0  | 3.0   |
| <i>% control</i>           | 100.0 | 96.6  | 75.0  | 10.2  |
| <i>Standard deviation</i>  | 9.5   | 2.9   | 6.2   | 2.6   |
| <i>t-test</i>              |       | 0.875 | 0.336 | 0.033 |
| <b><i>C. briggsae</i></b>  | 71    | 52    | 65    | 34    |
|                            | 70    | 32    | 50    | 49    |
|                            | 50    | 41    | 72    | 48    |
| <i>Average</i>             | 63.7  | 41.7  | 62.3  | 43.7  |
| <i>% control</i>           | 100.0 | 65.4  | 97.9  | 68.6  |
| <i>Standard deviation</i>  | 11.8  | 10.0  | 11.2  | 8.4   |
| <i>t-test</i>              |       | 0.072 | 0.894 | 0.083 |
| <b><i>C. remanei</i></b>   | 71    | 57    | 51    | 19    |
|                            | 50    | 36    | 59    | 29    |
|                            | 69    | 77    | 59    | 9     |
| <i>Average</i>             | 63.3  | 56.7  | 56.3  | 19.0  |
| <i>% control</i>           | 100.0 | 89.5  | 88.9  | 30.0  |
| <i>Standard deviation</i>  | 11.6  | 20.5  | 4.6   | 10.0  |
| <i>t-test</i>              |       | 0.656 | 0.412 | 0.008 |
| <b><i>C. brenneri</i></b>  | 72    | 64    | 61    | 21    |
|                            | 78    | 80    | 51    | 8     |
|                            | 65    | 92    | 62    | 15    |
| <i>Average</i>             | 71.7  | 78.7  | 58.0  | 14.7  |
| <i>% control</i>           | 100.0 | 109.8 | 80.9  | 20.5  |
| <i>Standard deviation</i>  | 6.5   | 14.0  | 6.1   | 6.5   |
| <i>t-test</i>              |       | 0.494 | 0.057 | 0.000 |
| <b><i>P. pacificus</i></b> | 119   | 93    | 84    | 30    |
|                            | 87    | 74    | 73    | 35    |
|                            | 98    | 110   | 80    | 8     |
| <i>Average</i>             | 101.3 | 92.3  | 79.0  | 24.3  |
| <i>% control</i>           | 100.0 | 91.1  | 78.0  | 24.0  |
| <i>Standard deviation</i>  | 16.3  | 18.0  | 5.6   | 14.4  |
| <i>t-test</i>              |       | 0.556 | 0.129 | 0.004 |
