# Supplementary material for: Phylogenomics of Ligand-Gated Ion Channels Predicts Monepantel Effect
Source: PubMed Central journal article supplement (PMC2936538; doi:10.1371/journal.ppat.1001091), 2010-09-09
Supplement: ppat.1001091.s010.pdf [file ppat.1001091.s010.pdf]

| Ivermectin [ $\mu$ M] | 0     | 0.01  | 0.05  | 0.1   | 1     | 10    |
|-----------------------|-------|-------|-------|-------|-------|-------|
| <i>C. elegans</i>     | 50    | 50    | 0     | 0     | 0     | 0     |
|                       | 50    | 8     | 0     | 0     | 0     | 0     |
|                       | 50    | 7     | 0     | 0     | 0     | 0     |
|                       | 51    | 50    | 0     | 0     | 0     | 0     |
| Average               | 50.3  | 28.8  | 0.0   | 0.0   | 0.0   | 0.0   |
| % control             | 100.0 | 57.2  | 0.0   | 0.0   | 0.0   | 0.0   |
| Standard deviation    | 0.5   | 24.5  | 0.0   | 0.0   | 0.0   | 0.0   |
| t-test                |       | 0.178 | 0.000 | 0.000 | 0.000 | 0.000 |
| <i>C. japonica</i>    | 3     | 2     | 0     | 0     | 0     | 0     |
|                       | 4     | 4     | 0     | 0     | 0     | 0     |
|                       | 5     | 3     | 0     | 0     | 0     | 0     |
|                       | 6     | 2     | 0     | 0     | 0     | 0     |
| Average               | 4.5   | 2.8   | 0.0   | 0.0   | 0.0   | 0.0   |
| % control             | 100.0 | 61.1  | 0.0   | 0.0   | 0.0   | 0.0   |
| Standard deviation    | 1.3   | 1.0   | 0.0   | 0.0   | 0.0   | 0.0   |
| t-test                |       | 0.076 | 0.006 | 0.006 | 0.006 | 0.006 |
| <i>C. briggsae</i>    | 50    | 50    | 1     | 0     | 0     | 0     |
|                       | 50    | 40    | 2     | 0     | 0     | 0     |
|                       | 50    | 50    | 0     | 0     | 0     | 0     |
|                       | 51    | 46    | 0     | 0     | 0     | 0     |
| Average               | 50.3  | 46.5  | 0.8   | 0.0   | 0.0   | 0.0   |
| % control             | 100.0 | 92.5  | 1.5   | 0.0   | 0.0   | 0.0   |
| Standard deviation    | 0.5   | 4.7   | 1.0   | 0.0   | 0.0   | 0.0   |
| t-test                |       | 0.211 | 0.000 | 0.000 | 0.000 | 0.000 |
| <i>C. remanei</i>     | 50    | 50    | 0     | 0     | 0     | 0     |
|                       | 50    | 32    | 0     | 0     | 0     | 0     |
|                       | 50    | 40    | 0     | 0     | 0     | 0     |
|                       | 51    | 50    | 0     | 0     | 0     | 0     |
| Average               | 50.3  | 43.0  | 0.0   | 0.0   | 0.0   | 0.0   |
| % control             | 100.0 | 85.6  | 0.0   | 0.0   | 0.0   | 0.0   |
| Standard deviation    | 0.5   | 8.7   | 0.0   | 0.0   | 0.0   | 0.0   |
| t-test                |       | 0.195 | 0.000 | 0.000 | 0.000 | 0.000 |
| <i>C. brenneri</i>    | 50    | 45    | 0     | 0     | 0     | 0     |
|                       | 50    | 50    | 0     | 0     | 0     | 0     |
|                       | 50    | 50    | 0     | 0     | 0     | 0     |
|                       | 51    | 46    | 0     | 0     | 0     | 0     |
| Average               | 50.3  | 47.8  | 0.0   | 0.0   | 0.0   | 0.0   |
| % control             | 100.0 | 95.0  | 0.0   | 0.0   | 0.0   | 0.0   |
| Standard deviation    | 0.5   | 2.6   | 0.0   | 0.0   | 0.0   | 0.0   |
| t-test                |       | 0.152 | 0.000 | 0.000 | 0.000 | 0.000 |
| <i>P. pacificus</i>   | 33    | 27    | 0     | 0     | 0     | 0     |
|                       | 22    | 20    | 0     | 0     | 0     | 0     |
|                       | 30    | 33    | 0     | 0     | 0     | 0     |
|                       | 36    | 36    | 0     | 0     | 0     | 0     |
| Average               | 30.3  | 29.0  | 0.0   | 0.0   | 0.0   | 0.0   |
| % control             | 100.0 | 95.9  | 0.0   | 0.0   | 0.0   | 0.0   |
| Standard deviation    | 6.0   | 7.1   | 0.0   | 0.0   | 0.0   | 0.0   |
| t-test                |       | 0.797 | 0.002 | 0.002 | 0.002 | 0.002 |
