# Supplementary material for: Phylogenomics of Ligand-Gated Ion Channels Predicts Monepantel Effect
Source: PubMed Central journal article supplement (PMC2936538; doi:10.1371/journal.ppat.1001091), 2010-09-09
Supplement: ppat.1001091.s012.pdf [file ppat.1001091.s012.pdf]

| <b>AAD-1566 [<math>\mu</math>M]</b> | <b>0</b> | <b>0.1</b> | <b>1</b> | <b>10</b> | <b>100</b> | <b>250</b> |
|-------------------------------------|----------|------------|----------|-----------|------------|------------|
| <b>C. elegans</b>                   | 129      | 55         | 0        | 0         | 0          | 0          |
|                                     | 88       | 81         | 0        | 0         | 0          | 0          |
|                                     | 107      | 98         | 0        | 0         | 0          | 0          |
|                                     | 119      | 97         | 0        | 0         | 0          | 0          |
| <i>Average</i>                      | 110.8    | 82.8       | 0.0      | 0.0       | 0.0        | 0.0        |
| <i>% control</i>                    | 100.0    | 74.7       | 0.0      | 0.0       | 0.0        | 0.0        |
| <i>Standard deviation</i>           | 17.6     | 20.1       | 0.0      | 0.0       | 0.0        | 0.0        |
| <i>t-test</i>                       |          | 0.082      | 0.001    | 0.001     | 0.001      | 0.001      |
| <b>VC1598</b>                       | 32       | 19         | 0        | 0         | 0          | 0          |
|                                     | 27       | 12         | 0        | 0         | 0          | 0          |
|                                     | 12       | 12         | 0        | 0         | 0          | 0          |
|                                     | 18       | 14         | 0        | 0         | 0          | 0          |
| <i>Average</i>                      | 22.3     | 14.3       | 0.0      | 0.0       | 0.0        | 0.0        |
| <i>% control</i>                    | 100.0    | 64.0       | 0.0      | 0.0       | 0.0        | 0.0        |
| <i>Standard deviation</i>           | 9.0      | 3.3        | 0.0      | 0.0       | 0.0        | 0.0        |
| <i>t-test</i>                       |          | 0.173      | 0.016    | 0.016     | 0.016      | 0.016      |
| <b>TU1803</b>                       | 113      | 38         | 0        | 0         | 0          | 0          |
|                                     | 103      | 42         | 0        | 0         | 0          | 0          |
|                                     | 102      | 46         | 0        | 0         | 0          | 0          |
|                                     | 89       | 45         | 0        | 0         | 0          | 0          |
| <i>Average</i>                      | 101.8    | 42.8       | 0.0      | 0.0       | 0.0        | 0.0        |
| <i>% control</i>                    | 100.0    | 42.0       | 0.0      | 0.0       | 0.0        | 0.0        |
| <i>Standard deviation</i>           | 9.8      | 3.6        | 0.0      | 0.0       | 0.0        | 0.0        |
| <i>t-test</i>                       |          | 0.000      | 0.000    | 0.000     | 0.000      | 0.000      |
| <b>NC293</b>                        | 58       | 26         | 0        | 0         | 0          | 0          |
|                                     | 56       | 32         | 0        | 0         | 0          | 0          |
|                                     | 68       | 31         | 0        | 0         | 0          | 0          |
|                                     | 64       | 30         | 0        | 0         | 0          | 0          |
| <i>Average</i>                      | 61.5     | 29.8       | 0.0      | 0.0       | 0.0        | 0.0        |
| <i>% control</i>                    | 100.0    | 48.4       | 0.0      | 0.0       | 0.0        | 0.0        |
| <i>Standard deviation</i>           | 5.5      | 2.6        | 0.0      | 0.0       | 0.0        | 0.0        |
| <i>t-test</i>                       |          | 0.000      | 0.000    | 0.000     | 0.000      | 0.000      |
| <b>RB1226</b>                       | 57       | 34         | 0        | 0         | 0          | 0          |
|                                     | 70       | 42         | 0        | 0         | 0          | 0          |
|                                     | 75       | 32         | 0        | 0         | 0          | 0          |
|                                     | 68       | 42         | 0        | 0         | 0          | 0          |
| <i>Average</i>                      | 67.5     | 37.5       | 0.0      | 0.0       | 0.0        | 0.0        |
| <i>% control</i>                    | 100.0    | 55.6       | 0.0      | 0.0       | 0.0        | 0.0        |
| <i>Standard deviation</i>           | 7.6      | 5.3        | 0.0      | 0.0       | 0.0        | 0.0        |
| <i>t-test</i>                       |          | 0.001      | 0.000    | 0.000     | 0.000      | 0.000      |
