# Supplementary material for: Phylogenomics of Ligand-Gated Ion Channels Predicts Monepantel Effect
Source: PLoS Pathog. 2010 Sep 9;6(9):e1001091. doi: 10.1371/journal.ppat.1001091 (PMC2936538; doi:10.1371/journal.ppat.1001091)
Supplement: Table S4 — Sensitivity to AAD-1566 determined in vitro. Number of adult worms present after 3 days exposure for C. elegans, C. japonica, C. briggsae, C. remanei, C. brenneri and P. pacificus. Green field background denotes presence of progeny after 6 days, indicating the ability to complete a whole life cycle. Yellow fields in t-test rows indicate that the hypothesis of the counts of that concentration being drawn from a normal distribution with the same average as the control (0%) could not be rejected at a 95% confidence level (two-tailed heteroscedastic t-test). (0.06 MB PDF) [file ppat.1001091.s011.pdf]

| AAD-1566 [ $\mu$ M] | 0     | 0.1   | 1     | 10    | 100   | 250   |
|---------------------|-------|-------|-------|-------|-------|-------|
| <i>C. elegans</i>   | 43    | 40    | 0     | 0     | 0     | 0     |
|                     | 53    | 44    | 0     | 0     | 0     | 0     |
|                     | 48    | 52    | 0     | 0     | 0     | 0     |
|                     | 52    | 39    | 0     | 0     | 0     | 0     |
| Average             | 49.0  | 43.8  | 0.0   | 0.0   | 0.0   | 0.0   |
| % control           | 100.0 | 89.3  | 0.0   | 0.0   | 0.0   | 0.0   |
| Standard deviation  | 4.5   | 5.9   | 0.0   | 0.0   | 0.0   | 0.0   |
| t-test              |       | 0.212 | 0.000 | 0.000 | 0.000 | 0.000 |
| <i>C. japonica</i>  | 61    | 2     | 0     | 0     | 0     | 0     |
|                     | 54    | 3     | 1     | 0     | 0     | 0     |
|                     | 42    | 2     | 2     | 0     | 0     | 0     |
|                     | 50    | 0     | 0     | 0     | 0     | 0     |
| Average             | 51.8  | 1.8   | 0.8   | 0.0   | 0.0   | 0.0   |
| % control           | 100.0 | 3.4   | 1.4   | 0.0   | 0.0   | 0.0   |
| Standard deviation  | 7.9   | 1.3   | 1.0   | 0.0   | 0.0   | 0.0   |
| t-test              |       | 0.001 | 0.001 | 0.001 | 0.001 | 0.001 |
| <i>C. briggsae</i>  | 47    | 49    | 9     | 0     | 0     | 0     |
|                     | 59    | 52    | 20    | 0     | 0     | 0     |
|                     | 53    | 39    | 24    | 0     | 0     | 0     |
|                     | 47    | 34    | 7     | 0     | 0     | 0     |
| Average             | 51.5  | 43.5  | 15.0  | 0.0   | 0.0   | 0.0   |
| % control           | 100.0 | 84.5  | 29.1  | 0.0   | 0.0   | 0.0   |
| Standard deviation  | 5.7   | 8.4   | 8.3   | 0.0   | 0.0   | 0.0   |
| t-test              |       | 0.174 | 0.001 | 0.000 | 0.000 | 0.000 |
| <i>C. remanei</i>   | 34    | 29    | 26    | 0     | 0     | 0     |
|                     | 30    | 26    | 20    | 1     | 0     | 0     |
|                     | 39    | 18    | 16    | 2     | 0     | 0     |
|                     | 33    | 23    | 11    | 2     | 0     | 0     |
| Average             | 34.0  | 24.0  | 18.3  | 1.3   | 0.0   | 0.0   |
| % control           | 100.0 | 70.6  | 53.7  | 3.7   | 0.0   | 0.0   |
| Standard deviation  | 3.7   | 4.7   | 6.3   | 1.0   | 0.0   | 0.0   |
| t-test              |       | 0.017 | 0.008 | 0.000 | 0.000 | 0.000 |
| <i>C. brenneri</i>  | 70    | 53    | 16    | 8     | 2     | 0     |
|                     | 62    | 57    | 24    | 12    | 9     | 1     |
|                     | 70    | 31    | 28    | 16    | 6     | 0     |
|                     | 61    | 46    | 16    | 8     | 3     | 0     |
| Average             | 65.8  | 46.8  | 21.0  | 11.0  | 5.0   | 0.3   |
| % control           | 100.0 | 71.1  | 31.9  | 16.7  | 7.6   | 0.4   |
| Standard deviation  | 4.9   | 11.4  | 6.0   | 3.8   | 3.2   | 0.5   |
| t-test              |       | 0.037 | 0.000 | 0.000 | 0.000 | 0.000 |
| <i>P. pacificus</i> | 50    | 66    | 26    | 20    | 23    | 0     |
|                     | 62    | 49    | 49    | 36    | 33    | 1     |
|                     | 50    | 47    | 38    | 37    | 12    | 2     |
|                     | 44    | 63    | 36    | 15    | 9     | 1     |
| Average             | 51.5  | 56.3  | 37.3  | 27.0  | 19.3  | 1.0   |
| % control           | 100.0 | 109.2 | 72.3  | 52.4  | 37.4  | 1.9   |
| Standard deviation  | 7.5   | 9.6   | 9.4   | 11.2  | 11.0  | 0.8   |
| t-test              |       | 0.469 | 0.058 | 0.014 | 0.004 | 0.001 |
| CB27                | 126   | 114   | 171   | 127   | 82    | 40    |
|                     | 154   | 112   | 142   | 93    | 69    | 56    |
|                     | 176   | 170   | 108   | 93    | 58    | 50    |
|                     | 179   | 133   | 158   | 102   | 77    | 20    |
| Average             | 158.8 | 132.3 | 144.8 | 103.8 | 71.5  | 41.5  |
| % control           | 100.0 | 256.8 | 281.1 | 201.5 | 138.8 | 80.6  |
| Standard deviation  | 24.5  | 26.9  | 27.2  | 16.1  | 10.5  | 15.8  |
| t-test              |       | 0.196 | 0.474 | 0.012 | 0.003 | 0.000 |
